# Supplementary material for: Evaluation of artemisinins for the treatment of acute myeloid leukemia
Source: Springer Nature journal article supplement (doi:10.1007/s00280-016-3038-2), 2016-04-28

**Supplementary Information**

**Evaluation of artemisinins for the treatment of acute myeloid leukemia**

Christina D. Drenberg Ph.D.1,2, Jassada Buaboonnam M.D. 3, Shelley Orwick B.S.2, Lie Li Ph.D.3, Yiping Fan Ph.D. 4, Anang A. Shelat Ph.D.5, R. Kiplin Guy Ph.D.5, Jeffrey Rubnitz M.D./Ph.D.6, and Sharyn D. Baker PharmD/Ph.D. 1,2

1Division of Pharmaceutics, College of Pharmacy, 2Comprehensive Cancer Center, The Ohio State University, Columbus, OH; Departments of 3Pharmaceutical Sciences, 4Computational Biology, 5Chemical Biology and Therapeutics, and 6Oncology, St. Jude Children’s Research Hospital, Memphis, TN.

**Supplementary Methods**

*Artesunate (ART) and dihydroartemisinin (DHA) pharmacokinetics*

For determination of ART and DHA in plasma, the following modifications were made. Quantitation of the ART and DHA was carried out with a Waters ACQUITY separation system and TQD triple-quadrupole system (Milford, MA). Separation was achieved on a Waters ACQUITY BEHC18 column (1.7 µm, 50 x 2.1 mm) using a column heater operating at 40°C with a Waters ACQUITY in-line filter. Autosampler temperature was maintained at 15°C ± 5°C. The gradient mobile phase was composed of 10 mM ammonium acetate in 0.1% formic acid of water (A) and acetonitrile (B). After injection, the B was increased from 30% to 80% in the 3 min and kept for 0.1 min. The column was then equilibrated at the initial condition (30%B) for 2 min before next injection. The flow rate was 0.7 ml/min and the separation was completed within 5.5 min. The mass spectrometer was operated in the positive mode**.** It was controlled by Masslynx 4.1 software (Micromass, UK). The analysis was performed in MRM mode and the following mass ions (*m/z*) were used for detection: *m/z* 402.2>267.1 for ART, 406.2>163.0 for ART_d4, 302.2>267.1 for DHA and 305.2>270.1 for DHA_d3. The MS/MS conditions were as follows: capillary voltage: 1.5 kV; cone voltage: 14V; source temperature: 150°C; desolvation temperature: 450 °C; cone gas flow: 10 L/h; desolvation gas flow: 900 L/h and collision energy: 10 v for ART and ART_d4, 12v for DHA and DHA_d3. Calibration and QC samples were prepared in mouse plasma to final concentrations from 10 to 2000 ng/ml for ART and 20 to 5000 ng/ml for DHA. Weighted linear least-squares regression (1/X2) as the weighting factor was employed to define the calibration curves using the ratios of the peak area of the analytes and the IS.

**Supplementary Figure Legends**

**Supplementary Figure S1.** **High-throughput screen of anti-malarial compounds demonstrate activity in a panel of AML cell lines.** (A) Heatmap of primary screen indicating activity relative to vehicle of anti-malarial test compounds (N=9) in a panel of AML cell lines (N=10). All compounds were screened at 10 µM and cell viability was determined using Cell Titer Glo at 72 hours. (B) Dose-response curves from secondary screen. Select compounds were evaluated based on complete activity (active in 10/10 cell lines; ART, DHA), intermediate activity (active in 6 - 8/10 cell lines; mefloquine, tafenoquine), or cell type specific activity (exclusively active in FLT3-ITD-positive cell lines; quinacrine). All compounds were screened in a dose-response manner 0.01 nM – 10 µM and cell viability was determined using Cell Titer Glo at 72 hours.

**Supplementary Figure S2. Effect of artesunate and DHA on cytotoxicity, ROS production, and lysosomal integrity.** (A) ML2 cells were treated with DMSO or increasing concentrations of artesunate (ART) or dihydroartemisinin (DHA) for 48 hours and cytotoxicity was measured by Celltox Green assay. Data are the mean ± SEM of two independent experiments (total of 6 replicates per concentration). (B) ML-2 and MOLM-13 cells were treated with DMSO and 1 µM or 10 µM ART or DHA for 24 hours and ROS production was measured using dihydroethidium. Data are the mean ± SEM of two independent experiments (total of 12 replicates per concentration). (C) ML-2 and MOLM-13 cells were treated with DMSO and 5 µM ART or DHA for 16 and 24 hours, respectively, and lysosomal integrity was determined using lysotracker. Plots are representative histograms and data are the mean percentage of positive cells from two independent experiments (total of 6 replicates per treatment).

**Supplementary Figure S3. Expression of lysosome biogenesis genes in pediatric primary AML blast samples.** Heatmap representation indicating expression of lysosome biogenesis genes in pediatric AML primary blast samples, representing multiple subtypes of AML and a variety of clinically relevant mutations, versus normal hematopoietic stem cells (HSCs). Data are derived from publically available datasets from pediatric AML primary blast samples[[30](#_ENREF_30)] and HSCs GSE30377, archived in the GEO database. R program was used to visualize log2 gene expression values. Expression is represented by a color with red representing high expression and green representing low expression (scale shown to the left of heatmap). Genetic subtype of each case is represented by colored bars across the top. HSC, normal hematopoietic stem cells (blue); t(15;17), translocation of chromosomes 15 and 17 (black); t(8;21), translocation of chromosomes 8 and 21 (green); Inv(16), inversion 16 (yellow); M7, French-American-British (FAB) subtype 7 designation (red); MLL, MLL-rearranged AML (aqua); other, all other subtypes (brown).

**Supplementary Figure S4. Pharmacokinetic profiles of artesunate and dihydroartemisinin in mice**. NSG mice were treated with a single oral dose of artesunate (ART) at (A) 60 mg/kg or (B) 120 mg/kg and serial blood sampling was performed. ART and DHA plasma concentrations were determined by LC-MS/MS. Values represent the mean ± SD. Concentration-time data were analyzed by non-compartmental analysis and pharmacokinetic parameters were calculated in WinNonLin.

**Supplementary Table S1. IC50 values of select compounds evaluated in a secondary dose-response high-throughput screen.**

| *Compound* | *IC50 (µM)* | | | | | | | | | |
| --- | --- | --- | --- | --- | --- | --- | --- | --- | --- | --- |
| *mFLT3* | *MOLM-13* | *MOLM-13 RES* | *MV4-11* | *ML-2* | *U937* | *CHRF288-11* | *CMK* | *CMS* | *M07e* |
| Artesunate | 0.91 | 2.4 | 1.5 | 1.5 | 6.5 | 2.2 | 8.9 | 8.2 | 4.7 | >10 |
| Dihydroartemisinin | 0.78 | 8.3 | Partial | 2.8 | 9 | 2.3 | 9.5 | >10 | >10 | >10 |
| Mefloquine | Inactive | Inactive | 8.4 | Inactive | >10 | 16 | >10 | Inactive | 19 | Inactive |
| Quinacrine | 11 | 2.9 | 3.6 | 3.8 | >10 | 3.9 | Inactive | 7.7 | 5.5 | 7.7 |
| Tafenoquine | 0.13 | Inactive | 3.8 | Inactive | >10 | >10 | >10 | Inactive | >10 | >10 |
| Inactive, curve score -2; Partial, curve score -1 or ~3-fold above noise | | | | |  |  |  |  |  |  |

**Supplementary Figure S1.**

**
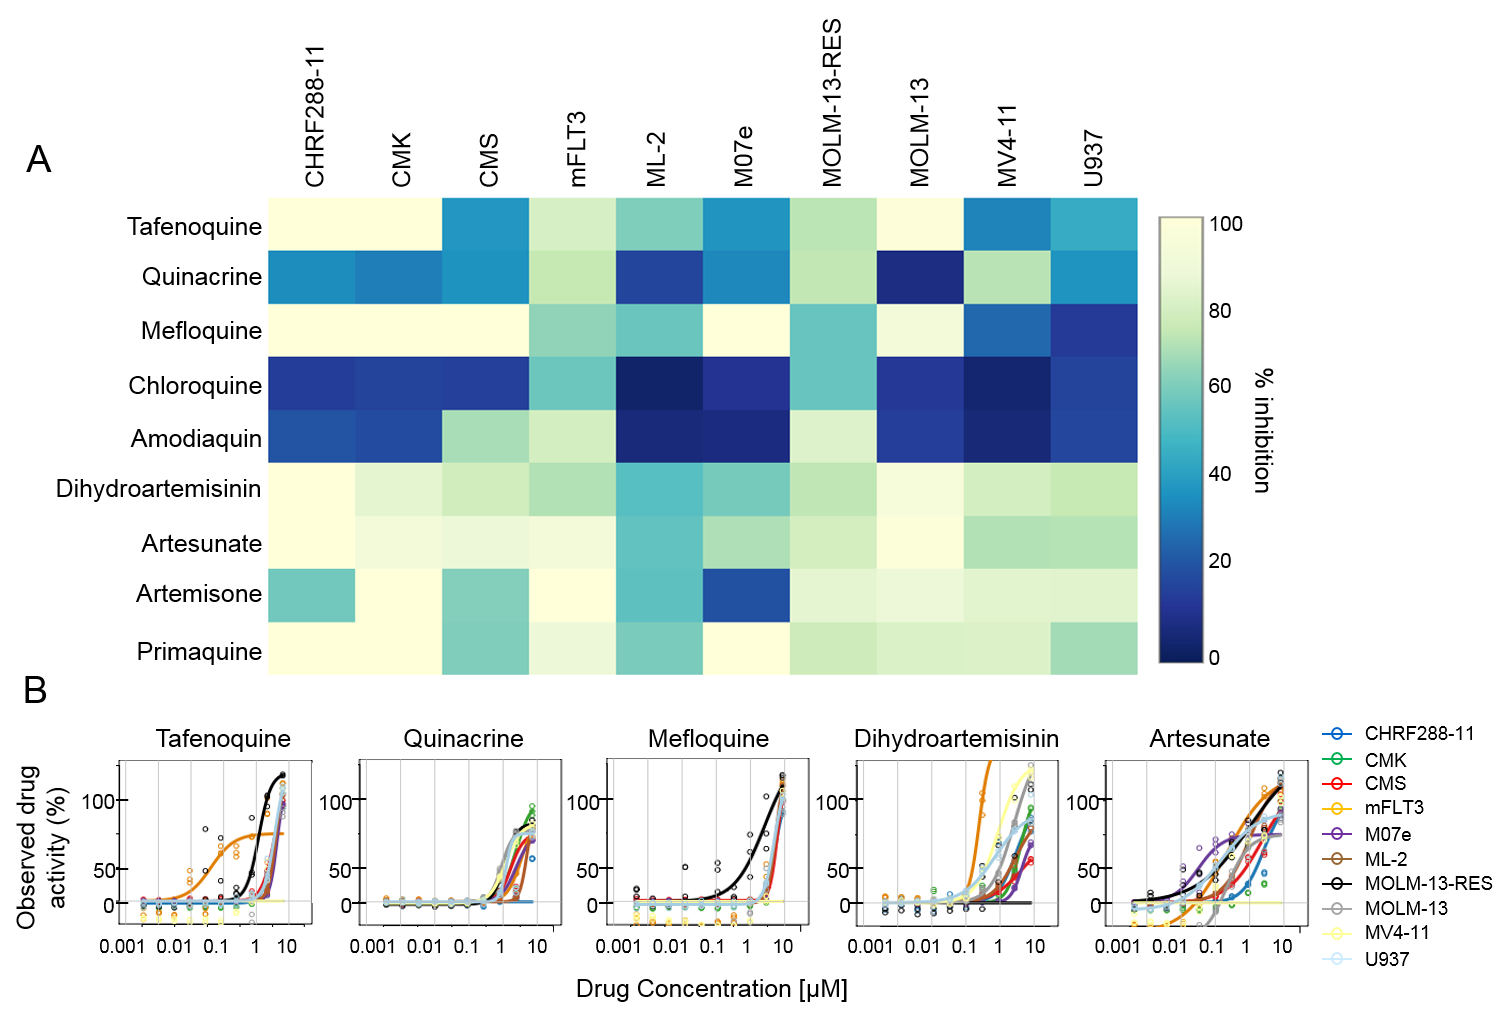
**

**Supplementary Figure S2.**

**
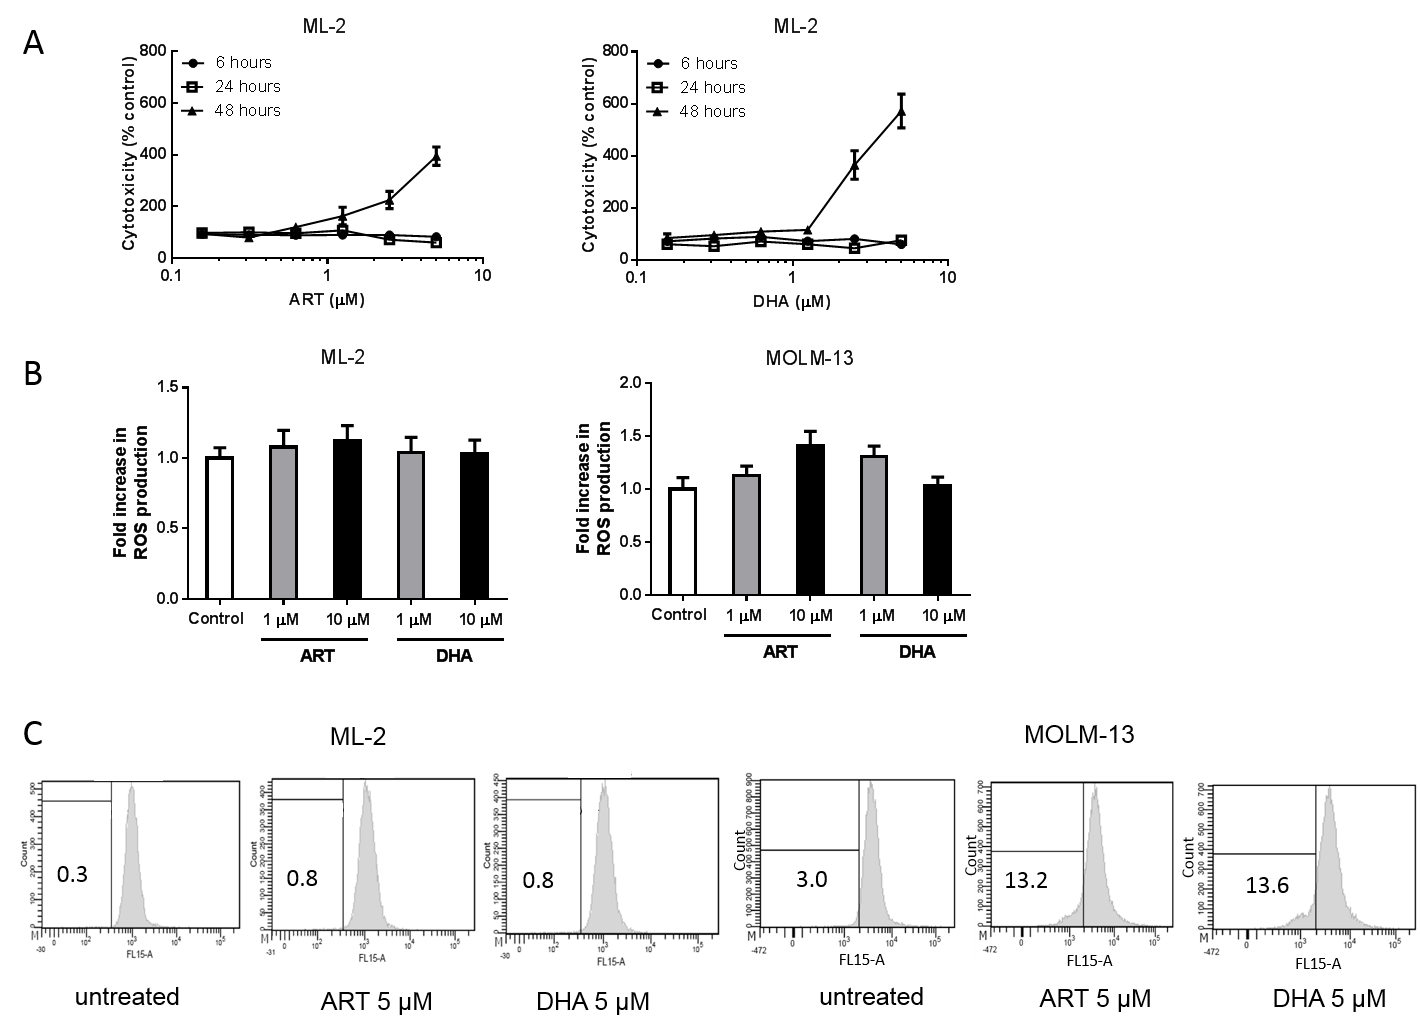
**

**Supplementary Figure S3.**

**
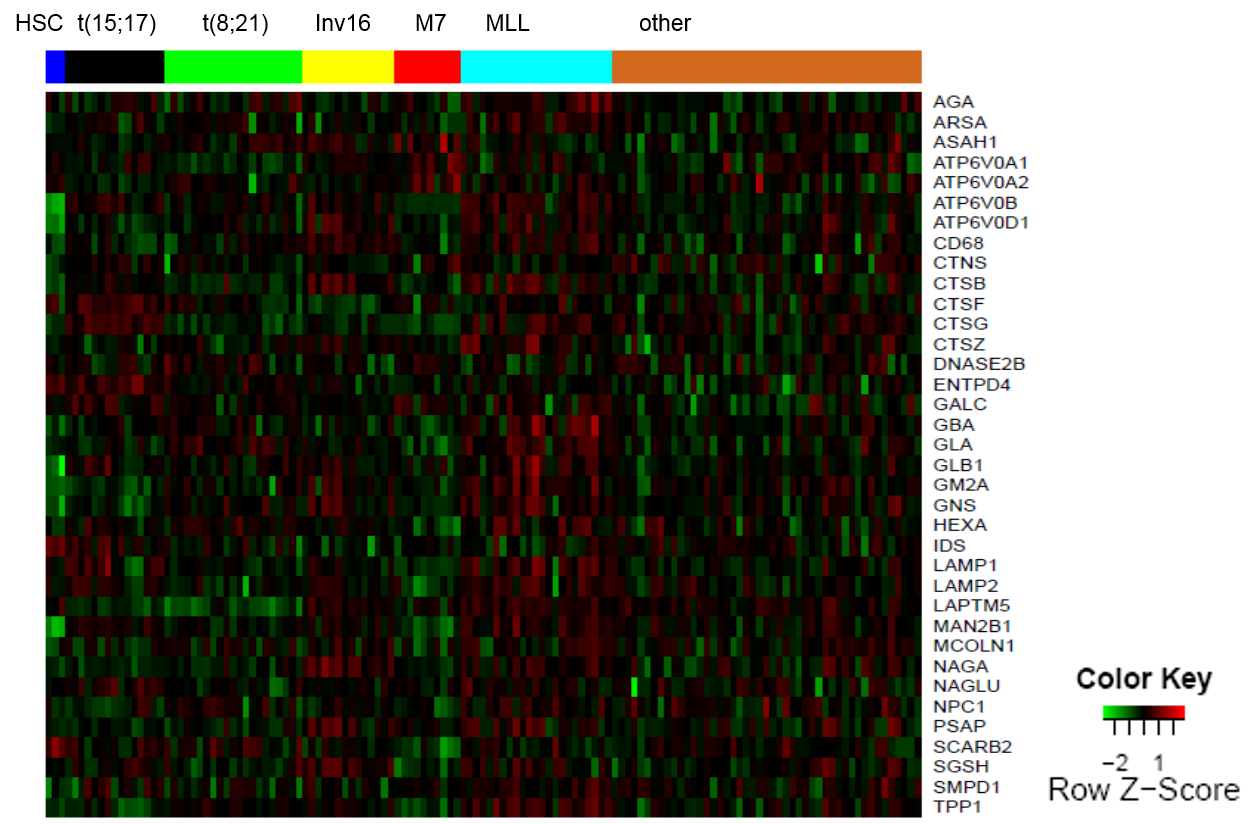
**

**Supplementary Figure S4.**


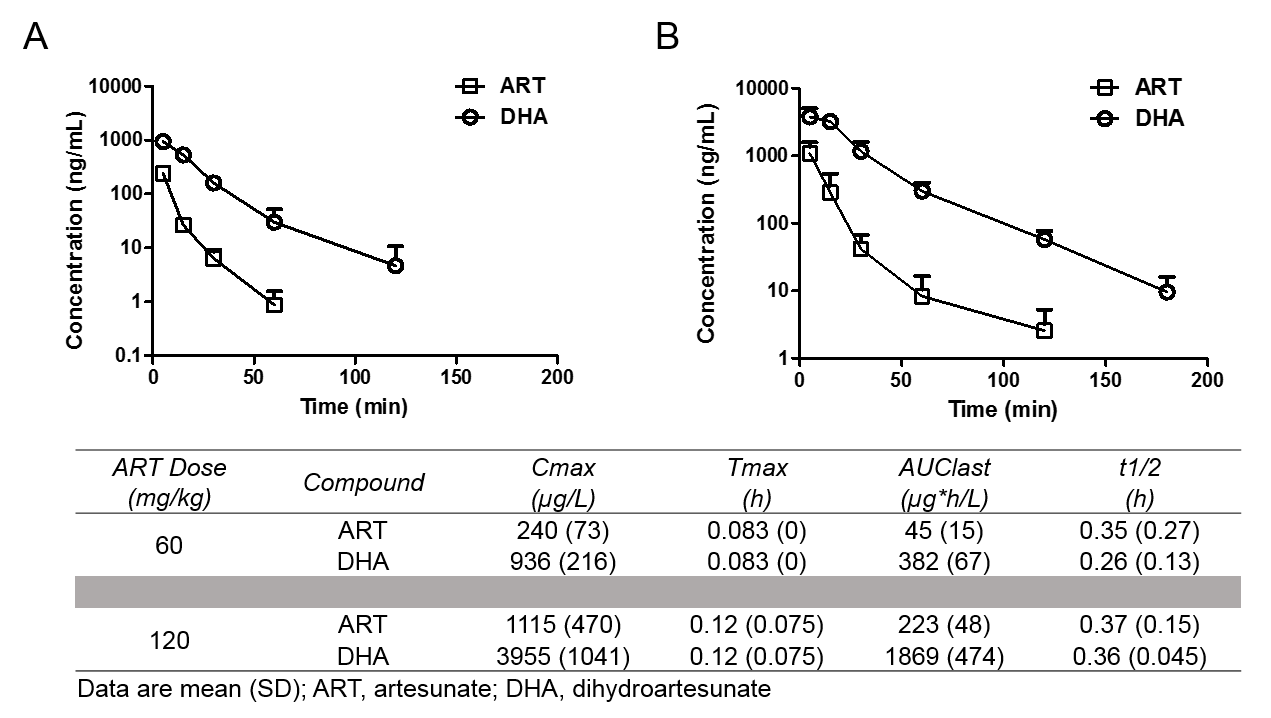

Supplement: MOESM1 [file 10103788]
